# Supplementary material for: Constraints on magnetism and correlations in RuO2 from lattice dynamics and Mössbauer spectroscopy
Source: Research Square preprint supplement (doi:10.21203/rs.3.rs-6572669/v1), 2025-05-02
Supplement: Supplementary file 1 [file 609643aea7becc5c84fcd382.pdf]

# Supplementary Information: Constraints on magnetism and correlations in RuO<sub>2</sub> from lattice dynamics and Mössbauer spectroscopy

George Yumnam,<sup>1,†</sup> Parul R. Raghuvanshi,<sup>1</sup> John D. Budai,<sup>1</sup> Dipanshu Bansal,<sup>1,‡</sup>  
Lars Bocklage,<sup>2,3</sup> Douglas Abernathy,<sup>4</sup> Yongqiang Cheng,<sup>4</sup> Ayman Said,<sup>5</sup> Igor I. Mazin,<sup>6,7</sup>  
Haidong Zhou,<sup>8</sup> Benjamin A. Frandsen,<sup>9</sup> David S. Parker,<sup>1</sup> Lucas R. Lindsay,<sup>1</sup>  
Valentino R. Cooper,<sup>1</sup> Michael E. Manley,<sup>1</sup> and Raphaël P. Hermann<sup>1,§</sup>

<sup>1</sup> Materials Science and Technology Division, Oak Ridge National Laboratory, Oak Ridge, TN 37831 USA

<sup>2</sup> Deutsches Elektronen-Synchrotron DESY, Notkestr. 85, 22607 Hamburg, Germany

<sup>3</sup> The Hamburg Centre for Ultrafast Imaging CUI, 22761 Hamburg, Germany

<sup>4</sup> Neutron Scattering Division, Oak Ridge National Laboratory, Oak Ridge, TN 37831

<sup>5</sup> Advanced Photon Source, Argonne National Laboratory, Lemont, IL USA

<sup>6</sup> Department of Physics and Astronomy, George Mason University, Fairfax, Virginia 22030 USA

<sup>7</sup> Quantum Science and Engineering Center, George Mason University, Fairfax, Virginia 22030 USA

<sup>8</sup> Department of Physics and Astronomy, University of Tennessee, Knoxville, Tennessee 37996, USA

<sup>9</sup> Department of Physics and Astronomy, Brigham Young University, Provo, Utah 84602, USA

## Mössbauer Spectroscopy Analysis

The Mössbauer spectroscopy data were analyzed using various fit parameter settings, including both positive and negative quadrupole splitting ( $\Delta E_Q$ ), as well as zero and non-zero asymmetry-parameters ( $\eta$ ). A positive  $\Delta E_Q$  indicates a positive electric field gradient ( $V_{zz}$ ), and vice-versa. To determine the correct sign of  $\Delta E_Q$  – and thus the sign of  $V_{zz}$  – we performed fits using positive and negative  $\Delta E_Q$  values under different parameter settings. As shown in Fig. S1, the best fit corresponds to a negative  $\Delta E_Q$ . The asymmetry parameter ( $\eta$ ) was fixed at 0.74, in agreement with previous NMR results (see main text). Setting  $\eta$  to zero results in a significantly worsened fit, confirming the necessity of a non-zero  $\eta$ . Additionally, fitting with a positive  $\Delta E_Q$  yields a poor match, particularly failing to reproduce the shape of the doublet tips.

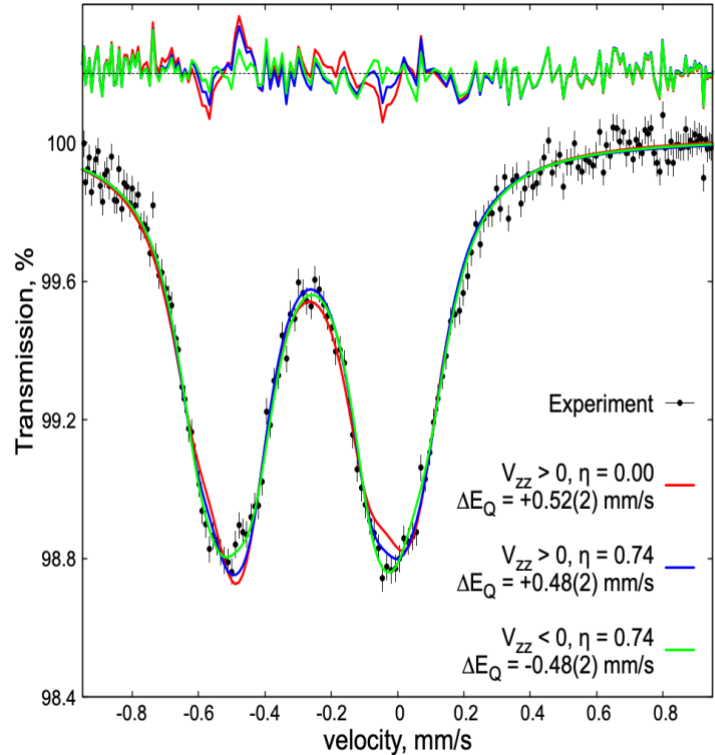

Fig. S1 Mössbauer spectra of RuO<sub>2</sub> with semi-constrained fits. The experimental data is shown as black solid circles with error bars, and the fits are shown as solid-colored curves. The differences of the experimental data and the fits are shown as colored curves above. The hyperfine field was fixed to zero for these fits ( $H_{hf} = 0$ ).

<sup>†</sup> [yumnamg@ornl.gov](mailto:yumnamg@ornl.gov)

<sup>§</sup> [hermannrp@ornl.gov](mailto:hermannrp@ornl.gov)

<sup>‡</sup> Current Address: Department of Mechanical Engineering, Indian Institute of Technology Bombay, Mumbai, 400076, India

## DFT Calculated Electric Field Gradient

**Table S1** Density functional theory calculated electric field gradient ( $V_{zz}$ ) along three directions, and the asymmetry parameter ( $\eta$ ) as computed with different DFT methods. . VASP was used for Method 1 and 2, and WIEN2k was used for Method 3 and 4.

| Method                  | $V_{zz}$ ( $10^{21}$ V/m <sup>2</sup> ) |        |         | $\eta$ | Lattice parameters<br>$a, c$ (Å)                  |
|-------------------------|-----------------------------------------|--------|---------|--------|---------------------------------------------------|
|                         | [110]                                   | [1-10] | [001]   |        |                                                   |
| 1) r <sup>2</sup> SCAN  | 7.802                                   | 3.140  | -10.941 | 0.426  | 4.492, 3.106<br>(Berlijn, <i>et. al.</i> [S1])    |
| 2) GGA+ $U$ ( $U = 0$ ) | 7.134                                   | 3.373  | -10.510 | 0.358  |                                                   |
| 3) GGA+ $U$ ( $U = 0$ ) | 6.384                                   | 3.447  | -9.831  | 0.299  | 4.531, 3.123<br>(Nowakowski, <i>et. al.</i> [S2]) |
| 4) GGA+ $U$ ( $U = 2$ ) | -1.146                                  | 8.496  | -7.350  | 0.731  |                                                   |

The DFT calculated electric field gradient ( $V_{zz}$ ) are highly sensitive to the initial structure, magnetism and the functional used for the calculation [S3]. We used two different initial lattice parameters obtained from experimental results for the  $V_{zz}$  calculations as shown in Table S1. Direct comparison of  $V_{zz}$  obtained from GGA+ $U$  ( $U = 0$ ) method with different initial lattice parameters reveal the sensitivity of these calculations in DFT. While the best match of the asymmetry parameter ( $\eta$ ) is given by GGA+ $U$  ( $U = 2$  eV) method, the principal axis of the electric field gradient is rotated by 90°.

## Dependence of Magnetism and Structure on Functional and Initial Magnetic Moment

**Table S2** PBE-GGA+ $U$  (with  $U = 0$  and 2 eV) and  $r^2$ SCAN calculations were performed with and without initial magnetic moments (MAGMOM), i.e.,  $\mu^{\text{initial}} = 0$  and  $\mu^{\text{initial}} \neq 0$ . The structures were fully relaxed and the computed lattice parameters are given.

| Functional   | Type                             | Result | $\mu^{\text{relaxed}}$<br>( $\mu\text{B}/\text{Ru}$ ) | Computed<br>lattice parameters ( $\text{\AA}$ ) |
|--------------|----------------------------------|--------|-------------------------------------------------------|-------------------------------------------------|
| PBE-GGA+ $U$ | $U = 0 \text{ eV}; \mu^i \neq 0$ | NM     | 0                                                     | $a = 4.520, c = 3.118$                          |
|              | $U = 2 \text{ eV}; \mu^i \neq 0$ | AFM    | $\sim 1.179$                                          | $a = 4.530, c = 3.123$                          |
| $r^2$ SCAN   | $\mu^i = 0$                      | NM     | 0                                                     | $a = 4.472, c = 3.114$                          |
|              | $\mu^i \neq 0$                   | AFM    | $\sim 0.963$                                          | $a = 4.487, c = 3.115$                          |

Table S2 presents the magnetic states, moments, energies, and lattice parameters obtained using PBE-GGA+ $U$  and  $r^2$ SCAN functionals under different magnetic initialization settings. While all calculated lattice parameters are within reasonable range of experimental values ( $a = b \approx 4.49 \text{ \AA}$ ,  $c \approx 3.11 \text{ \AA}$ ) [S1,S4], the  $r^2$ SCAN AFM configuration, with an initial magnetic moment, shows the closest agreement with experiment. PBE+ $U$  results are more sensitive to the  $U$  value, with  $U = 2 \text{ eV}$  favoring an AFM state but overestimating the lattice constants, while  $U = 0 \text{ eV}$  gives a non-magnetic state with better structural agreement. Overall, while structural agreement can be achieved in both PBE+ $U$  ( $U = 0 \text{ eV}$ ) and  $r^2$ SCAN AFM cases, the  $r^2$ SCAN AFM configuration best captures both the magnetic and structural properties of  $\text{RuO}_2$ . However, when comparing with experimental phonon spectra (see Fig. 2 in manuscript), a better agreement is observed for the PBE+ $U$  ( $U = 2 \text{ eV}$ ) AFM and  $r^2$ SCAN NM configurations, indicating that the best structural match does not necessarily correspond to the best dynamical properties. This underscores the subtle interplay among magnetism, structure, and lattice dynamics in  $\text{RuO}_2$ , reinforcing that the lattice dynamics are primarily driven by electronic correlations.

## Supplementary References

- [S1] T. Berlijn *et al.*, *Phys Rev Lett* **118** 7, 077201 (2017).
- [S2] P. Nowakowski, *et al.*, *J. Solid State Chem.* **181** 5, 1005-1016 (2008).
- [S3] K. Choudhary, J. N. Ansari, I. I. Mazin, and K. L. Sauer, *Sci Data* **7** 1, 362 (2020).
- [S4] H. S. O'Neill and J. Nell, *Geochim Cosmochim Acta* **61** 24, 5279-5293 (1997).
